# Supplementary material
Source: ML conference proceedings conference paper supplement (https://proceedings.neurips.cc/paper_files/paper/2020/hash/294e09f267683c7ddc6cc5134a7e68a8-Abstract.html)

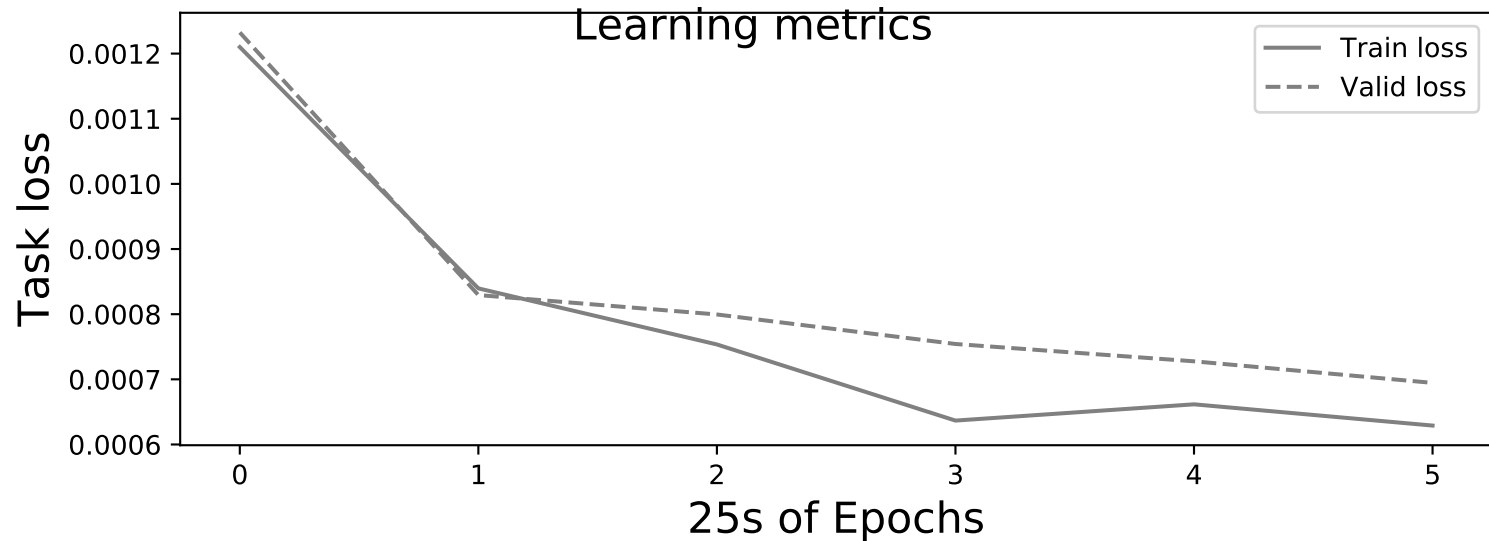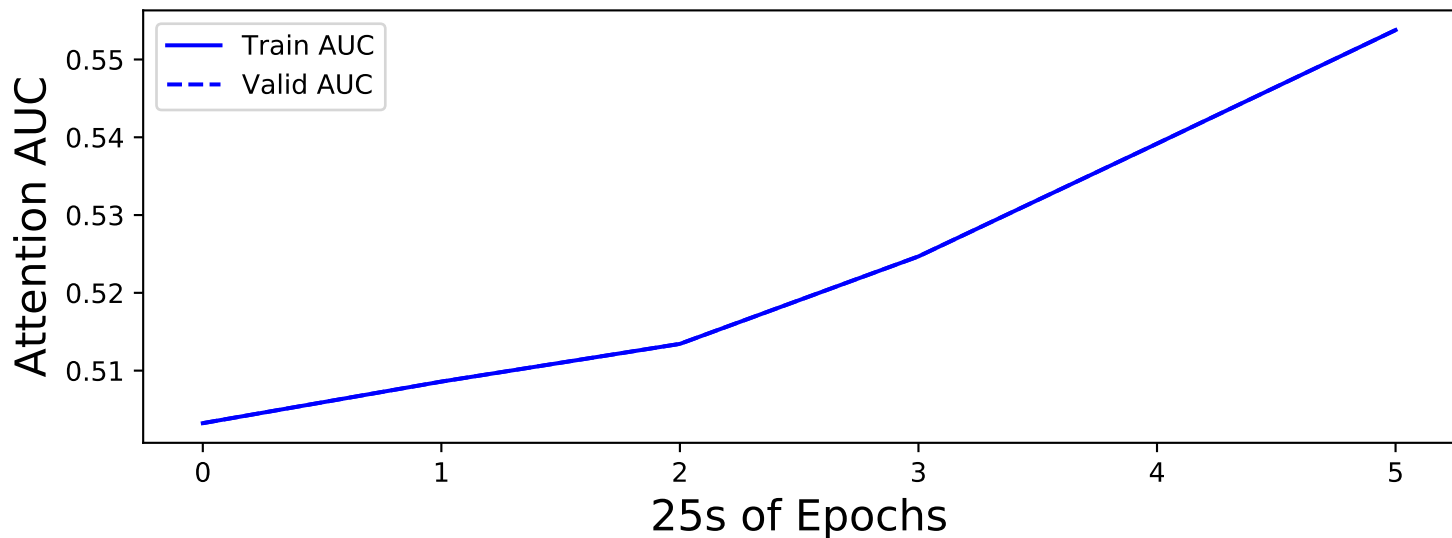

Supplement: Supplementary file [file 294e09f267683c7ddc6cc5134a7e68a8-Supplemental.zip]
